# Supplementary material
Source: publisher site journal article supplement (https://www.degruyterbrill.com/publication/isbn/9781614517900/downloadAsset/9781614517900_Contents.pdf)
Supplement: Supplementary file 1 [file 9781614517900_Contents.pdf]

# Contents

- Andreas Trotzke and Josef Bayer  
**1 Syntactic complexity across interfaces — 1**
- Uli Sauerland  
**2 Against complexity parameters — 9**
- Jan-Wouter Zwart  
**3 Top-down derivation, recursion, and the model of grammar — 25**
- Leah S. Bauke  
**4 What small clauses can tell us about complex sentence structure — 43**
- Werner Frey and Hubert Truckenbrodt  
**5 Syntactic and prosodic integration and disintegration in peripheral adverbial clauses and in right dislocation/afterthought — 75**
- Marlies Kluck  
**6 On representing anchored parentheses in syntax — 107**
- Tonjes Veenstra  
**7 The development of subordination — 137**
- Tom Roeper  
**8 Avoid Phase: How interfaces provide critical triggers for *wh*-movement in acquisition — 163**
- Misha Becker  
**9 Learning structures with displaced arguments — 193**
- Index — 227**
